# Supplementary material for: A novel risk signature based on liquid-liquid phase separation-related genes reveals prognostic and tumour microenvironmental features in clear cell renal cell carcinoma
Source: Aging (Albany NY). 2024 Mar 27;16(7):6118–34. doi: 10.18632/aging.205691 (PMC11042959; doi:10.18632/aging.205691)
Supplement: Supplementary Table 2 [file aging-16-205691-s002.xls]

Supplementary Table 2. All LLPS-related genes associated with overall survival.
id	HR	HR.95L	HR.95H	p-value
LAT	2.595516594	1.759844762	3.828011729	1.50E-06
RBFOX1	0.757478382	0.256749847	2.234756925	0.614829047
SYN2	1.257671655	0.627225269	2.521802087	0.518357761
NPHS1	0.850647843	0.575710057	1.256885724	0.41673576
ALDOB	0.862808192	0.805666184	0.924003007	2.43E-05
ACOT11	0.753193354	0.530429919	1.069510236	0.113119352
DRD3	6.709479839	0.042572849	1057.413843	0.46093378
WDR62	2.997037513	2.134118686	4.208872689	2.37E-10
CENPU	1.463404131	1.102093165	1.943167527	0.008490854
EGF	0.935733238	0.784942321	1.115491762	0.458756795
IFNG	1.437462724	1.183120542	1.746482298	0.000259694
SCD	1.054694379	0.919207711	1.210151112	0.447800276
FGF23	1.002234818	0.459781113	2.184680064	0.995520045
ASF1B	1.566588161	1.253069739	1.958548987	8.15E-05
FGF10	2.292382967	0.596420912	8.810924567	0.227184884
CACNA1G	1.86965633	1.114134566	3.137515792	0.017828762
GPR101	0.008521079	6.12E-09	11865.45535	0.509122775
ZP2	0.343632034	0.00370149	31.90147342	0.644025032
PADI4	0.900957247	0.445817216	1.820755079	0.771392029
PCSK6	0.868564528	0.766827267	0.983799576	0.02662823
BLM	2.496360658	1.684359678	3.699813417	5.18E-06
KIF18A	3.181248154	2.265165432	4.46781488	2.41E-11
PRMT8	0.527242078	0.078144217	3.557322867	0.511085626
SLC6A4	0.844157527	0.292771606	2.433985791	0.753850679
RELN	1.187903303	0.967605649	1.458356778	0.099906836
NTN1	0.886720435	0.698190221	1.126158898	0.32424383
TERT	1.601598382	1.116161835	2.29815901	0.01057487
PLA2R1	0.909032764	0.675329289	1.223611325	0.529342
HSPA2	1.0267159	0.846948992	1.244638756	0.788338207
LIM2	0.806987662	0.299635623	2.173403418	0.671393635
CHIA	0.556169401	0.090666593	3.411668978	0.52612621
TRPC7	1.507371146	0.851154399	2.669513046	0.159342471
TRIB3	1.386716171	1.230982571	1.562151881	7.49E-08
ATP2A1	1.999821611	1.489957612	2.684161244	3.92E-06
EIF4A1	1.49576038	1.239030422	1.805685377	2.78E-05
TDGF1	0.810256332	0.586398518	1.119571937	0.202185674
COL9A2	1.478402677	1.230678743	1.775991083	2.94E-05
RUNX1	1.668366628	1.372267701	2.02835584	2.83E-07
CAMP	0.757776757	0.43962627	1.306167655	0.318053785
HSPB3	1.239942464	0.901173943	1.706060553	0.186543686
P2RX2	0.263330619	0.00419822	16.51724186	0.527453478
PTCRA	1.235512035	0.672003228	2.271551572	0.49608953
POU4F1	1.083860729	0.780593335	1.50495018	0.630611898
KRT6A	1.334643639	1.051223991	1.694475828	0.017781831
LILRB1	1.499680264	1.163560779	1.93289507	0.001748332
ELAVL4	0.635008712	0.142507924	2.829569423	0.551405765
TOP2A	1.678891958	1.394107066	2.021852034	4.67E-08
DAZL	1.392004499	0.291989507	6.636116983	0.678091156
HIST1H3J	1.220306026	0.73055366	2.038381135	0.446892494
ASPM	2.482576445	1.868568927	3.298345444	3.55E-10
PKD2L1	1.106815987	0.773041816	1.584702929	0.579434347
TTK	3.27194879	2.389734052	4.479849495	1.42E-13
RAD51	1.973910329	1.458981974	2.670575824	1.04E-05
ALB	0.999968437	0.84103816	1.188931635	0.999714824
CENPF	2.120090248	1.696786693	2.648996882	3.77E-11
KHDRBS2	0.878441974	0.411207855	1.876569946	0.737883621
FANCA	2.238710518	1.593729786	3.144714259	3.35E-06
NTRK1	2.712731521	1.5579024	4.723602908	0.000420789
PDHA2	0.014980032	3.97E-07	565.6066734	0.43463663
UHRF1	1.827716039	1.474920713	2.264898643	3.56E-08
CLIC5	0.558871029	0.444782063	0.702224422	5.90E-07
CLIC3	1.403523341	1.159015175	1.699613439	0.000518543
ESYT3	0.663393038	0.283060495	1.554757134	0.344969528
CDC20	1.878849571	1.611240258	2.190905851	8.66E-16
CDKN3	2.03457346	1.687298813	2.453323105	1.02E-13
GSTO2	0.843589157	0.640503743	1.111067148	0.226107861
CDKN2A	1.619725503	1.318229485	1.990177533	4.45E-06
PFN3	1.470884153	0.592961928	3.648632552	0.405150363
IGF2BP3	2.036701822	1.637849978	2.532682705	1.59E-10
ATP2B2	0.809492892	0.667246144	0.982064487	0.032071363
TSKS	1.278672099	0.740409111	2.208241785	0.377875615
MYB	1.298296265	0.898647853	1.875677093	0.164322872
CCDC185	4.116965753	0.768653999	22.05076281	0.098396153
RNASET2	1.27078462	1.12803199	1.431602618	8.10E-05
HHIPL2	1.904179374	1.218657367	2.975322831	0.004678192
DDX47	2.886129108	1.851289224	4.499427275	2.89E-06
CDCA8	2.080270057	1.713591372	2.525411589	1.32E-13
MXD3	2.694097778	2.106141028	3.446190327	3.03E-15
ALDH1A2	0.97453958	0.825703389	1.150204063	0.760364991
U2AF1	3.721144731	1.424131626	9.723060604	0.00733029
CRYAA	0.566792705	0.125151265	2.566925482	0.461293233
AKR1B15	1.769184234	1.310357682	2.388670588	0.000195619
SLC25A31	0.751945169	0.134672622	4.198489099	0.745256145
ITK	1.117733397	0.856467812	1.458698074	0.412576622
TAGLN3	1.664787956	1.319036906	2.101168607	1.78E-05
KIF15	2.678012771	1.905691134	3.763334085	1.39E-08
CDK3	3.194807683	2.07044968	4.929748465	1.53E-07
FABP5	1.554965759	1.295074008	1.867011844	2.23E-06
KIF5A	2.026369124	1.161598733	3.534931391	0.012861148
PIH1D3	5427.174975	8.220256114	3583127.801	0.009434343
NTNG2	1.946869278	1.44933566	2.615198183	9.66E-06
CCR4	0.725052103	0.552741912	0.951077782	0.02021878
KIF2C	2.135267242	1.750211031	2.605037971	7.61E-14
ZBP1	1.822639008	1.403785102	2.366468307	6.61E-06
DTL	1.41337565	1.042820513	1.9156036	0.025731175
NDC80	2.847838952	2.196477366	3.692360696	2.83E-15
SH3GL2	0.80786894	0.657227044	0.993039209	0.042733645
CAND2	0.833522901	0.503677012	1.379376882	0.47862491
PDGFRA	1.19353436	1.022989078	1.392511708	0.024520277
KIF14	3.976957798	2.716551545	5.822158373	1.26E-12
BRCA2	0.94200939	0.506170019	1.753129696	0.850481012
MLKL	1.141482354	0.860155332	1.514821702	0.359375877
TP73	1.721062358	1.169568934	2.532604583	0.005875166
ARG1	1.28378583	0.61234065	2.691485626	0.508352268
CDC25C	2.731153325	2.028182646	3.677774534	3.66E-11
DISC1	0.582450455	0.37323693	0.908936134	0.017290553
HMMR	2.016546976	1.60984187	2.52600071	1.04E-09
RAB33A	0.832945837	0.654019469	1.060822803	0.138493305
CP	1.070858209	0.99683274	1.15038086	0.061045458
RAB11FIP4	0.551050412	0.347924781	0.872764956	0.011084849
FOXH1	6.426405651	2.393885867	17.25173709	0.000222049
CENPA	2.570377189	2.063083278	3.202410181	3.89E-17
RALYL	1.393680459	0.859708243	2.259307431	0.178075768
PSMA8	19.5820622	0.445487366	860.7587756	0.123302345
CHD5	0.939198274	0.551026037	1.600819812	0.817655091
TF	1.178078436	1.074556708	1.291573344	0.000478906
ATP2B3	1.845152143	1.254786227	2.713280045	0.001848107
CCNE2	3.100003908	1.722677421	5.578539608	0.000160436
PTTG1	1.846887131	1.580313548	2.158427409	1.22E-14
STX1B	1.682558819	1.214338886	2.331313122	0.001765344
MAPK4	0.867886682	0.544243834	1.383988657	0.551771242
RIMBP3	5.884421444	0.322571693	107.3448676	0.231590449
KIFC1	2.060346671	1.649262555	2.573894854	1.94E-10
IGF2BP2	1.470606462	1.288978844	1.677826891	9.80E-09
ELAVL3	0.886158946	0.495616877	1.58444499	0.683534985
PRKAR2B	1.343236476	1.006052553	1.793429403	0.045405193
PCBP3	1.618680594	1.337178932	1.959443724	7.78E-07
RUNX3	1.063128416	0.895516442	1.262111979	0.484358604
SPHK1	1.653968452	1.394787063	1.961311309	7.19E-09
KRT7	0.94285951	0.84869005	1.047477881	0.273096816
NEU4	1.304397916	0.929594199	1.830318997	0.124158077
CRABP1	1.005698765	0.83933515	1.205037112	0.950887202
PYHIN1	1.136543698	0.911656703	1.4169057	0.255217057
CCDC116	6.102483015	1.895794904	19.64363279	0.002426666
YPEL4	1.470534801	1.038015502	2.083275827	0.030013615
ACTG2	0.968869974	0.857272038	1.094995502	0.612502288
PIK3R6	1.576972624	1.294576835	1.920969531	6.06E-06
PABPC1L	1.634574115	1.432441502	1.865229773	2.96E-13
AKR1D1	0.796119648	0.323761717	1.95763261	0.619415166
HIST1H2AM	1.499235236	1.152332812	1.950570417	0.002561761
NUF2	2.932035442	2.330085716	3.689491667	4.52E-20
HIST1H2BM	1.192020223	0.748285193	1.898891259	0.459681268
HIST1H2AJ	0.978719471	0.63523783	1.507926256	0.92230119
APOA1	1.175194887	0.888178624	1.554960888	0.258496862
DNAJB13	1.199451976	0.999944212	1.438765309	0.0500703
GAL	1.675693939	1.201544885	2.336949882	0.002351074
APOBEC3G	1.360228248	1.122668259	1.648056646	0.001681002
CCNA2	2.185203817	1.762809804	2.708809374	9.84E-13
CCDC36	1.223598708	0.616883946	2.427026684	0.563601109
BIRC5	1.835850068	1.563788259	2.155244133	1.14E-13
ATP6V1G3	0.89656938	0.769717311	1.044327106	0.160700671
NDNF	1.051693007	0.95932354	1.152956363	0.282560382
ACAP1	1.506924917	1.215086611	1.86885666	0.000188603
NEK2	2.315957471	1.845358868	2.906566902	4.28E-13
PLK1	2.367741668	1.963954279	2.854547413	1.64E-19
SCIN	0.922443573	0.817123463	1.041338529	0.19185609
PKP1	1.055730303	0.902638496	1.234787211	0.497469132
KPNA7	1.12031861	0.673161999	1.864504815	0.662000988
MAP6	0.878900441	0.597072645	1.293755445	0.51287616
ACTL6B	1.142701846	0.680528921	1.918753882	0.613940044
GSDMA	0.9486803	0.655571117	1.372840089	0.779935541
TYRO3	1.719708029	1.223541882	2.417077624	0.001798782
TPTE2	1.179792012	0.683123817	2.037565015	0.553142726
PGK2	1661.111122	12.38838155	222732.0937	0.003007592
CELF6	2.368379907	0.261229635	21.4723853	0.443352807
NTNG1	1.618335391	1.01976618	2.568245043	0.041049222
PDIA2	1.301834312	1.095554876	1.546953614	0.002728286
ENOX1	0.695429464	0.436428432	1.108136188	0.126509261
HAP1	1.177836499	0.631515808	2.196776076	0.606777225
TUBB2B	1.381387056	1.159361076	1.645932608	0.000301513
ENO2	1.319053316	1.122353209	1.550226467	0.000776867
TUBA8	8.258421362	2.009457192	33.94027186	0.003414625
CALML5	1.745006858	0.578500659	5.263691383	0.32297463
SH3GL3	2.405140797	1.128825437	5.124532159	0.022969378
